# Supplementary material
Source: PubMed Central journal article supplement (PMC10654767)
Supplement: EIJ-D-23-00456_Tomii_SD.pdf [file EIJ-D-23-00456_Tomii_SD.pdf]

## Supplementary data

Supplementary Table 1. Predicted EOA based on transcatheter heart valve type and size.

|                              | Predicted EOA according to<br>Hahn et al. (9) |
|------------------------------|-----------------------------------------------|
| <b>SAPIEN XT</b>             |                                               |
| 23 mm                        | 1.41 cm <sup>2</sup>                          |
| 26 mm                        | 1.74 cm <sup>2</sup>                          |
| 29 mm                        | 2.06 cm <sup>2</sup>                          |
| <b>SAPIEN 3 / 3 Ultra</b>    |                                               |
| 20 mm                        | 1.22 cm <sup>2</sup>                          |
| 23 mm                        | 1.45 cm <sup>2</sup>                          |
| 26 mm                        | 1.74 cm <sup>2</sup>                          |
| 29 mm                        | 1.89 cm <sup>2</sup>                          |
| <b>CoreValve</b>             |                                               |
| 23 mm                        | 1.12 cm <sup>2</sup>                          |
| 26 mm                        | 1.74 cm <sup>2</sup>                          |
| 29 mm                        | 1.97 cm <sup>2</sup>                          |
| 31 mm                        | 2.15 cm <sup>2</sup>                          |
| <b>Evolut R/PRO/PRO Plus</b> |                                               |
| 23 mm                        | 1.09 cm <sup>2</sup>                          |
| 26 mm                        | 1.69 cm <sup>2</sup>                          |
| 29 mm                        | 1.97 cm <sup>2</sup>                          |
| 34 mm                        | 2.6 cm <sup>2</sup>                           |

EOA: effective orifice area.

**Supplementary Table 2. Predicted EOA based on aortic annulus dimensions by preprocedural computed tomography.**

|                                                  |  | <b>Predicted EOA according<br/>to Hahn et al. (9)</b> |
|--------------------------------------------------|--|-------------------------------------------------------|
| <b>SAPIEN 3 / 3 Ultra</b>                        |  |                                                       |
| <b>Annulus area</b>                              |  |                                                       |
| 248 to 384 mm <sup>2</sup>                       |  | 1.41 cm <sup>2</sup>                                  |
| 385 to 439 mm <sup>2</sup>                       |  | 1.58 cm <sup>2</sup>                                  |
| 440 to 488 mm <sup>2</sup>                       |  | 1.73 cm <sup>2</sup>                                  |
| 489 to 537 mm <sup>2</sup>                       |  | 1.79 cm <sup>2</sup>                                  |
| 538 to 678 mm <sup>2</sup>                       |  | 1.91 cm <sup>2</sup>                                  |
| <b>CoreValve</b>                                 |  |                                                       |
| <b>Perimeter derived aortic annulus diameter</b> |  |                                                       |
| ≤22.8 mm                                         |  | 1.71 cm <sup>2</sup>                                  |
| >22.8 to 24.5 mm                                 |  | 1.80 cm <sup>2</sup>                                  |
| >24.5 to 25.9 mm                                 |  | 1.92 cm <sup>2</sup>                                  |
| >25.9 to 27.6 mm                                 |  | 1.94 cm <sup>2</sup>                                  |
| >27.6 to 41.5 mm                                 |  | 2.06 cm <sup>2</sup>                                  |
| <b>Evolut R/PRO/PRO Plus</b>                     |  |                                                       |
| <b>Perimeter derived aortic annulus diameter</b> |  |                                                       |
| ≤22.3 mm                                         |  | 1.66 cm <sup>2</sup>                                  |
| >22.3 to 23.2 mm                                 |  | 1.82 cm <sup>2</sup>                                  |
| >23.2 to 24.7 mm                                 |  | 1.98 cm <sup>2</sup>                                  |
| >24.7 to 26.2 mm                                 |  | 1.98 cm <sup>2</sup>                                  |
| >26.2 to 30.2 mm                                 |  | 2.56 cm <sup>2</sup>                                  |

EOA: effective orifice area.

**Supplementary Table 3. Frequency of PPM according to device type.**

|                                                                  | <b>All patients<br/>(N = 2,463)</b> | <b>Balloon-expandable valve<br/>(N = 1,551)</b> | <b>Self-expanding valve<br/>(N = 912)</b> | <b>P value</b> |
|------------------------------------------------------------------|-------------------------------------|-------------------------------------------------|-------------------------------------------|----------------|
| <b>Measured PPM</b>                                              |                                     |                                                 |                                           |                |
| Measured EOAI (cm <sup>2</sup> /m <sup>2</sup> )                 | 0.95 ± 0.29                         | 0.92 ± 0.28                                     | 1.0 ± 0.31                                | <0.001         |
| Moderate or severe measured PPM, n (%)                           | 879 (35.7%)                         | 619 (39.9%)                                     | 260 (28.5%)                               | <0.001         |
| Moderate measured PPM, n (%)                                     | 664 (27.0%)                         | 475 (30.6%)                                     | 189 (20.7%)                               | <0.001         |
| Severe measured PPM, n (%)                                       | 215 (8.7%)                          | 144 (9.3%)                                      | 71 (7.8%)                                 | 0.210          |
| <b>Predicted PPM<sub>THV</sub></b>                               |                                     |                                                 |                                           |                |
| Predicted EOAI <sub>THV</sub> (cm <sup>2</sup> /m <sup>2</sup> ) | 0.96 ± 0.15                         | 0.92 ± 0.12                                     | 1.03 ± 0.18                               | <0.001         |
| Moderate or severe predicted PPM <sub>THV</sub> , n (%)          | 308 (12.5%)                         | 232 (15.0%)                                     | 76 (8.3%)                                 | <0.001         |
| Moderate predicted PPM <sub>THV</sub> , n (%)                    | 279 (11.3%)                         | 232 (15.0%)                                     | 47 (5.2%)                                 | <0.001         |
| Severe predicted PPM <sub>THV</sub> , n (%)                      | 29 (1.2%)                           | 0                                               | 29 (3.2%)                                 | <0.001         |
| <b>Predicted PPM<sub>CT</sub></b>                                |                                     |                                                 |                                           |                |
| Predicted EOAI <sub>CT</sub> (cm <sup>2</sup> /m <sup>2</sup> )  | 0.97 ± 0.15                         | 0.90 ± 0.12                                     | 1.05 ± 0.15                               | <0.001         |
| Moderate or severe predicted PPM <sub>CT</sub> , n (%)           | 190 (12.1%)                         | 171 (19.2%)                                     | 19 (2.8%)                                 | <0.001         |
| Moderate predicted PPM <sub>CT</sub> , n (%)                     | 189 (12.0%)                         | 170 (19.1%)                                     | 19 (2.8%)                                 | <0.001         |

|                                            |          |          |   |      |
|--------------------------------------------|----------|----------|---|------|
| Severe predicted PPM <sub>CT</sub> , n (%) | 1 (0.1%) | 1 (0.1%) | 0 | 1.00 |
|--------------------------------------------|----------|----------|---|------|

Values are mean  $\pm$  SD or n (%).

EOAi = effective orifice area index body surface area; PPM = prosthesis-patient mismatch; PPM<sub>CT</sub> = PPM defined by predicted EOA derived from pre-procedural computed tomography; PPM<sub>THV</sub> = PPM defined by predicted EOA for each size and model of implanted transcatheter heart valve.



|                                                             |                     |                 |                |                |            |                 |                |                |            |
|-------------------------------------------------------------|---------------------|-----------------|----------------|----------------|------------|-----------------|----------------|----------------|------------|
| Hypertension, n (%)                                         | 216<br>4<br>(87.9%) | 1384<br>(87.4%) | 588<br>(88.6%) | 192<br>(89.3%) | 0.58<br>6  | 1880<br>(87.2%) | 258<br>(92.5%) | 26<br>(89.7%)  | 0.04<br>0  |
| Diabetes mellitus, n (%)                                    | 672<br>(27.3%)      | 415<br>(26.2%)  | 198<br>(29.8%) | 59<br>(27.4%)  | 0.21<br>3  | 579<br>(26.9%)  | 87<br>(31.2%)  | 6<br>(20.7%)   | 0.22<br>7  |
| Renal failure (eGFR <60 mL/min/1.73 m <sup>2</sup> ), n (%) | 159<br>9<br>(64.9%) | 1032<br>(65.2%) | 435<br>(65.5%) | 132<br>(61.4%) | 0.51<br>5  | 1425<br>(66.2%) | 151<br>(54.1%) | 23<br>(79.3%)  | <0.0<br>01 |
| Coronary artery disease, n (%)                              | 139<br>3<br>(56.6%) | 881<br>(55.6%)  | 381<br>(57.4%) | 131<br>(60.9%) | 0.29<br>8  | 1210<br>(56.1%) | 164<br>(58.8%) | 19<br>(65.5%)  | 0.43<br>7  |
| <b>Previous history</b>                                     |                     |                 |                |                |            |                 |                |                |            |
| Atrial fibrillation, n (%)                                  | 806<br>(32.7%)      | 480<br>(30.3%)  | 251<br>(37.8%) | 75<br>(34.9%)  | 0.00<br>2  | 714<br>(33.1%)  | 83<br>(29.7%)  | 9<br>(31.0%)   | 0.51<br>6  |
| Peripheral artery disease, n (%)                            | 309<br>(12.5%)      | 198<br>(12.5%)  | 76<br>(11.4%)  | 35<br>(16.3%)  | 0.17<br>7  | 274<br>(12.7%)  | 31<br>(11.1%)  | 4<br>(13.8%)   | 0.73<br>3  |
| <b>Echocardiography</b>                                     |                     |                 |                |                |            |                 |                |                |            |
| Indexed aortic valve area, cm <sup>2</sup> /m <sup>2</sup>  | 0.28<br>±<br>0.44   | 0.29 ±<br>0.54  | 0.27 ±<br>0.10 | 0.26 ±<br>0.08 | 0.36<br>6  | 0.27 ±<br>0.09  | 0.35 ±<br>1.29 | 0.28 ±<br>0.09 | 0.03<br>1  |
| Mean aortic valve gradient, mmHg                            | 40.1<br>±<br>16.6   | 40.2 ±<br>16.9  | 40.1 ±<br>16.6 | 39.1 ±<br>15.1 | 0.65<br>4  | 40.1 ±<br>16.8  | 40.0 ±<br>16.0 | 39.9 ±<br>15.6 | 0.99<br>1  |
| LVEF, %                                                     | 55.0<br>±<br>13.7   | 55.9 ±<br>13.4  | 53.7 ±<br>14.0 | 52.0 ±<br>14.3 | <0.0<br>01 | 54.6 ±<br>13.8  | 57.3 ±<br>12.5 | 56.5 ±<br>10.8 | 0.01<br>1  |
| Aortic regurgitation moderate or severe, n (%)              | 251<br>(10.2%)      | 153<br>(9.7%)   | 74<br>(11.2%)  | 24<br>(11.2%)  | 0.49<br>8  | 218<br>(10.1%)  | 27<br>(9.7%)   | 6<br>(20.7%)   | 0.16<br>7  |
| Mitral regurgitation moderate or severe, n (%)              | 429<br>(20.1%)      | 253<br>(18.3%)  | 127<br>(21.9%) | 49<br>(27.2%)  | 0.00<br>8  | 384<br>(20.3%)  | 37<br>(16.4%)  | 8<br>(32.0%)   | 0.12<br>6  |

|                                                                                                                                                                                  |                 |                 |                |                |        |                 |                |                |        |
|----------------------------------------------------------------------------------------------------------------------------------------------------------------------------------|-----------------|-----------------|----------------|----------------|--------|-----------------|----------------|----------------|--------|
| Tricuspid regurgitation moderate or severe, n (%)                                                                                                                                | 237<br>(12.2%)  | 139<br>(11.2%)  | 74<br>(14.1%)  | 24<br>(14.0%)  | 0.176  | 207<br>(12.1%)  | 24<br>(12.0%)  | 6<br>(25.0%)   | 0.158  |
| <b>Procedural characteristics and outcomes</b>                                                                                                                                   |                 |                 |                |                |        |                 |                |                |        |
| General anesthesia, n (%)                                                                                                                                                        | 422<br>(17.1%)  | 271<br>(17.1%)  | 114<br>(17.2%) | 37<br>(17.2%)  | 0.999  | 366<br>(17.0%)  | 50<br>(17.9%)  | 6<br>(20.7%)   | 0.813  |
| Femoral main access site, n (%)                                                                                                                                                  | 2306<br>(93.6%) | 1479<br>(93.4%) | 626<br>(94.3%) | 201<br>(93.5%) | 0.722  | 2020<br>(93.7%) | 259<br>(92.8%) | 27<br>(93.1%)  | 0.839  |
| Valve type, n (%)                                                                                                                                                                |                 |                 |                |                | <0.001 |                 |                |                | <0.001 |
| Balloon-expandable                                                                                                                                                               | 1551<br>(63.0%) | 932<br>(58.8%)  | 475<br>(71.5%) | 144<br>(67.0%) | <0.001 | 1319<br>(61.2%) | 232<br>(83.2%) | 0              | <0.001 |
| Self-expanding                                                                                                                                                                   | 912<br>(37.0%)  | 652<br>(41.2%)  | 189<br>(28.5%) | 71<br>(33.0%)  | <0.001 | 836<br>(38.8%)  | 47<br>(16.8%)  | 29<br>(100.0%) | <0.001 |
| Device generation, n (%)                                                                                                                                                         |                 |                 |                |                | <0.001 |                 |                |                | <0.001 |
| Early-generation devices                                                                                                                                                         | 604<br>(24.5%)  | 429<br>(27.1%)  | 127<br>(19.1%) | 48<br>(22.3%)  | <0.001 | 558<br>(25.9%)  | 41<br>(14.7%)  | 5<br>(17.2%)   | <0.001 |
| Newer-generation devices                                                                                                                                                         | 1859<br>(75.5%) | 1155<br>(72.9%) | 537<br>(80.9%) | 167<br>(77.7%) | <0.001 | 1597<br>(74.1%) | 238<br>(85.3%) | 24<br>(82.8%)  | <0.001 |
| Valve size, mm                                                                                                                                                                   | 26.6 ± 2.3      | 26.8 ± 2.2      | 26.3 ± 2.4     | 25.9 ± 2.6     | <0.001 | 27.0 ± 2.1      | 23.9 ± 1.6     | 23.0 ± 0.0     | <0.001 |
| Valve size ≤23 mm, n (%)                                                                                                                                                         | 424<br>(17.2%)  | 200<br>(12.6%)  | 153<br>(23.0%) | 71<br>(33.0%)  | <0.001 | 194<br>(9.0%)   | 201<br>(72.0%) | 29<br>(100%)   | <0.001 |
| Values are mean ± SD or n (%). Early-generation devices includes Medtronic CoreValve and SAPIEN XT. Newer-generation includes SAPIEN 3/SAPIEN 3 Ultra and Evolut R/PRO/PRO Plus. |                 |                 |                |                |        |                 |                |                |        |

eGFR = estimated glomerular filtration rate; LVEF = left ventricular ejection fraction; NYHA = New York Heart Association; STS-PROM = society of thoracic surgeons predicted risk of mortality; TAVR = transcatheter aortic valve replacement. Other abbreviations as in Table 1.



**Supplementary Table 5. Post-TAVR valve haemodynamics.**

|                                                                                                                                                        | Measured PPM           |                          |                        |                | Predicted PPM <sub>THV</sub> |                          |                       |                |
|--------------------------------------------------------------------------------------------------------------------------------------------------------|------------------------|--------------------------|------------------------|----------------|------------------------------|--------------------------|-----------------------|----------------|
|                                                                                                                                                        | None<br>(N =<br>1,584) | Moderate<br>(N =<br>664) | Severe<br>(N =<br>215) | P<br>valu<br>e | None<br>(N =<br>2,155)       | Moderate<br>(N =<br>279) | Severe<br>(N =<br>29) | P<br>valu<br>e |
| Prosthetic mean gradient, mmHg                                                                                                                         | 9.1 ±<br>4.0           | 11.5 ±<br>4.4            | 13.4 ±<br>6.4          | <0.0<br>01     | 9.7 ±<br>4.3                 | 13.4 ±<br>5.4            | 13.6 ±<br>6.7         | <0.0<br>01     |
| High residual gradient (mean gradient ≥20 mmHg), n (%)                                                                                                 | 17<br>(1.1%)           | 34<br>(5.2%)             | 31<br>(14.6%)          | <0.0<br>01     | 46<br>(2.1%)                 | 33<br>(12.0%)            | 3<br>(10.3%)          | <0.0<br>01     |
| Measured EOAI, cm <sup>2</sup> /m <sup>2</sup>                                                                                                         | 1.09 ±<br>0.26         | 0.74 ±<br>0.07           | 0.54 ±<br>0.09         | <0.0<br>01     | 0.96 ±<br>0.29               | 0.82 ±<br>0.29           | 0.75 ±<br>0.19        | <0.0<br>01     |
| Moderate or severe aortic regurgitation, n (%)                                                                                                         | 64<br>(4.1%)           | 24<br>(3.6%)             | 9<br>(4.2%)            | 0.87<br>5      | 90<br>(4.2%)                 | 7<br>(2.6%)              | 0                     | 0.23<br>6      |
| Left ventricular ejection fraction, (%)                                                                                                                | 57.1 ±<br>12.9         | 54.1 ±<br>13.5           | 52.4 ±<br>15.8         | <0.0<br>01     | 55.7 ±<br>13.4               | 57.2 ±<br>14.1           | 56.6 ±<br>9.2         | 0.38<br>0      |
| Left ventricular ejection fraction <50%, n (%)                                                                                                         | 186<br>(21.7%)         | 113<br>(30.7%)           | 39<br>(33.1%)          | <0.0<br>01     | 303<br>(26.0%)               | 30<br>(18.5%)            | 5<br>(27.8%)          | 0.11<br>6      |
| Stroke volume index, mL/m <sup>2</sup>                                                                                                                 | 40.0 ±<br>11.7         | 32.3 ±<br>8.3            | 29.8 ±<br>10.8         | <0.0<br>01     | 36.9 ±<br>11.5               | 37.7 ±<br>12.0           | 35.2 ±<br>9.0         | 0.38<br>2      |
| Left ventricular ejection fraction and stroke volume index were evaluated by transthoracic echocardiography at discharge. Abbreviations as in Table 1. |                        |                          |                        |                |                              |                          |                       |                |

**Supplementary Table 6. Crude hazard ratios for clinical outcomes according to the method for the definition of PPM.**

|                                         | Measured PPM      |         |                   |         | Predicted PPM <sub>THV</sub> |         |                    |         |
|-----------------------------------------|-------------------|---------|-------------------|---------|------------------------------|---------|--------------------|---------|
|                                         | Moderate vs. None |         | Severe vs. None   |         | Moderate vs. None            |         | Severe vs. None    |         |
|                                         | Crude HR (95% CI) | P value | Crude HR (95% CI) | P value | Crude HR (95% CI)            | P value | Crude HR (95% CI)  | P value |
| <b>At 1 year</b>                        |                   |         |                   |         |                              |         |                    |         |
| All-cause death, n (%)                  | 1.18 (0.89-1.55)  | 0.245   | 1.14 (0.74-1.75)  | 0.547   | 0.49 (0.29 - 0.82)           | 0.007   | 0.62 (0.15 - 2.50) | 0.501   |
| Cardiovascular death, n (%)             | 1.29 (0.92-1.82)  | 0.138   | 1.25 (0.73-2.12)  | 0.413   | 0.52 (0.27 - 0.98)           | 0.044   | 0.99 (0.24 - 3.99) | 0.986   |
| Structural valve deterioration, n (%)   | 1.03 (0.49-2.17)  | 0.930   | 1.60 (0.61-4.22)  | 0.339   | 1.18 (0.46 - 3.01)           | 0.736   | -                  | -       |
| Repeat aortic valve intervention, n (%) | 1.08 (0.38-3.11)  | 0.884   | 2.69 (0.86-8.45)  | 0.090   | 2.59 (0.94 - 7.12)           | 0.065   | -                  | -       |
| <b>At 5 year</b>                        |                   |         |                   |         |                              |         |                    |         |
| All-cause death, n (%)                  | 1.18 (0.99-1.41)  | 0.066   | 1.01 (0.77-1.33)  | 0.938   | 0.64 (0.47 - 0.88)           | 0.005   | 0.59 (0.25 - 1.43) | 0.247   |
| Cardiovascular death, n (%)             | 1.27 (1.03-1.57)  | 0.024   | 1.05 (0.75-1.46)  | 0.770   | 0.70 (0.49 - 1.00)           | 0.048   | 0.70 (0.26 - 1.87) | 0.477   |
| Structural valve deterioration, n (%)   | 1.35 (0.73-2.51)  | 0.339   | 2.13 (1.01-4.48)  | 0.047   | 1.03 (0.44 - 2.40)           | 0.949   | -                  | -       |
| Repeat aortic valve intervention, n (%) | 1.09 (0.42-2.81)  | 0.860   | 2.44 (0.89-6.72)  | 0.084   | 3.03 (1.27 - 7.21)           | 0.012   | -                  | -       |

| At 10 year                                                                                                                                                                                                                                                                                                                                                                                                                                        |                  |       |                  |       |                             |           |                             |           |
|---------------------------------------------------------------------------------------------------------------------------------------------------------------------------------------------------------------------------------------------------------------------------------------------------------------------------------------------------------------------------------------------------------------------------------------------------|------------------|-------|------------------|-------|-----------------------------|-----------|-----------------------------|-----------|
| All-cause death, n (%)                                                                                                                                                                                                                                                                                                                                                                                                                            | 1.17 (0.99-1.38) | 0.061 | 1.11 (0.86-1.44) | 0.409 | 0.69<br>(0.52<br>-<br>0.90) | 0.00<br>7 | 0.57<br>(0.26<br>-<br>1.28) | 0.17<br>6 |
| Cardiovascular death, n (%)                                                                                                                                                                                                                                                                                                                                                                                                                       | 1.24 (1.02-1.51) | 0.029 | 1.17 (0.87-1.59) | 0.304 | 0.71<br>(0.52<br>-<br>0.98) | 0.03<br>9 | 0.67<br>(0.28<br>-<br>1.62) | 0.37<br>2 |
| Structural valve deterioration, n (%)                                                                                                                                                                                                                                                                                                                                                                                                             | 1.21 (0.67-2.20) | 0.528 | 2.05 (0.98-4.28) | 0.056 | 1.11<br>(0.51<br>-<br>2.45) | 0.78<br>9 | -                           | -         |
| Repeat aortic valve intervention, n (%)                                                                                                                                                                                                                                                                                                                                                                                                           | 1.07 (0.44-2.58) | 0.887 | 2.36 (0.87-6.42) | 0.093 | 3.79<br>(1.72<br>-<br>8.34) | 0.00<br>1 | -                           | -         |
| <p>Event counts with Kaplan-Meier failure rates (%) counting the first event of each type only per patient. Patients were censored at last valid contact with events assessed and adjudicated. Adjusted hazard ratios and p-values after adjusting for age, gender and STS-PROM.</p> <p>CI = confidence interval; HR = hazard ratio; PPM = prosthesis-patient mismatch; STS -PROM = society of thoracic surgeons predicted risk of mortality.</p> |                  |       |                  |       |                             |           |                             |           |

**Supplementary Table 7. Residual heart failure symptoms according to the method for the definition of PPM.**

|                                      | Measured PPM        |                   |                  |                       |                 |                       |        | Predicted PPM <sub>THV</sub> |                  |                   |                       |                 |                       |                   |
|--------------------------------------|---------------------|-------------------|------------------|-----------------------|-----------------|-----------------------|--------|------------------------------|------------------|-------------------|-----------------------|-----------------|-----------------------|-------------------|
|                                      | None                | Moderate          | Severe           | Moderate vs. None     | Severe vs. None |                       | None   | Moderate                     | Severe           | Moderate vs. None |                       | Severe vs. None |                       |                   |
|                                      | N=15<br>84          | N=6<br>64         | N=2<br>15        | RR<br>(95%<br>CI)     | P<br>value      | RR<br>(95%<br>CI)     |        |                              |                  | P<br>value        | N=21<br>55            | N=2<br>79       | N=2<br>9              | RR<br>(95%<br>CI) |
| NYHA class III or IV (%) at 1 year   | 127/1244<br>(10.2%) | 53/517<br>(10.3%) | 18/71<br>(10.5%) | 1.0<br>(0.74 - 1.36)  | 0.097           | 1.03<br>(0.65 - 1.65) | 0.089  | 173/1683<br>(10.3%)          | 21/225<br>(9.3%) | 4/4<br>(16.7%)    | 0.91<br>(0.59 - 1.40) | 0.066           | 1.62<br>(0.66 - 4.01) | 0.029             |
| NYHA class III or IV (%) at 5 years  | 57/66<br>(15.6%)    | 19/31<br>(14.5%)  | 6/57<br>(10.5%)  | 0.93<br>(0.58 - 1.50) | 0.077           | 0.68<br>(0.31 - 1.50) | 0.033  | 72/89<br>(14.7%)             | 9/6<br>(16.1%)   | 1/9<br>(11.1%)    | 1.09<br>(0.58 - 2.06) | 0.078           | 0.75<br>(0.12 - 4.86) | 0.076             |
| NYHA class III or IV (%) at 10 years | 6/34<br>(17.6%)     | 2/7<br>(28.6%)    | 1/1<br>(100.0%)  | 1.62<br>(0.40 - 6.53) | 0.049           | 5.67<br>(2.72 - 11.8) | <0.001 | 8/37<br>(21.6%)              | 1/4<br>(25.0%)   | 0/1<br>(0%)       | 1.16<br>(0.19 - 7.19) | 0.087           | -                     | -                 |

Risk ratios (95% CIs) from robustified Poisson regression are reported, with corresponding P values. CI = confidence interval; NYHA = New York Heart Association; RR = risk ratio; PPM = prosthesis-patient mismatch; PPM<sub>THV</sub> = prosthesis-patient mismatch defined by the normal reference values of effective orifice area for each size and model of implanted transcatheter heart valve.



|                                                                                                                                                                                                                                                                                                                                                                                                                                                                                                                                                                         |                  |       |                  |       |                                 |            |                                 |           |
|-------------------------------------------------------------------------------------------------------------------------------------------------------------------------------------------------------------------------------------------------------------------------------------------------------------------------------------------------------------------------------------------------------------------------------------------------------------------------------------------------------------------------------------------------------------------------|------------------|-------|------------------|-------|---------------------------------|------------|---------------------------------|-----------|
| Cardiovascular death, n (%)                                                                                                                                                                                                                                                                                                                                                                                                                                                                                                                                             | 1.17 (0.98-1.39) | 0.082 | 1.13 (0.86-1.49) | 0.376 | 0.70<br>(0.5<br>2-<br>0.94<br>) | 0.018      | 0.66<br>(0.2<br>8-<br>1.58<br>) | 0.35<br>4 |
| Structural valve deterioration, n (%)                                                                                                                                                                                                                                                                                                                                                                                                                                                                                                                                   | 1.17 (0.68-2.02) | 0.577 | 1.71 (0.83-3.52) | 0.144 | 1.19<br>(0.5<br>7-<br>2.50<br>) | 0.639      | -                               | -         |
| Repeat aortic valve intervention, n (%)                                                                                                                                                                                                                                                                                                                                                                                                                                                                                                                                 | 1.17 (0.53-2.58) | 0.702 | 2.03 (0.76-5.42) | 0.159 | 3.89<br>(1.8<br>3-<br>8.24<br>) | <0.00<br>1 | -                               | -         |
| <p>Competing risk with death, or in case of cardiovascular death with non-cardiovascular death, reported are subdistributions of the hazard ratio (SHR) with confidence intervals (95% CI). Adjusted hazard ratios and p-values after adjusting for age, gender and STS-PROM.</p> <p>PPM = prosthesis-patient mismatch; PPMTHV = prosthesis-patient mismatch defined by the normal reference values of effective orifice area for each size and model of implanted transcatheter heart valve; STS -PROM = society of thoracic surgeons predicted risk of mortality.</p> |                  |       |                  |       |                                 |            |                                 |           |

Supplementary Figure 1. Study flowchart.

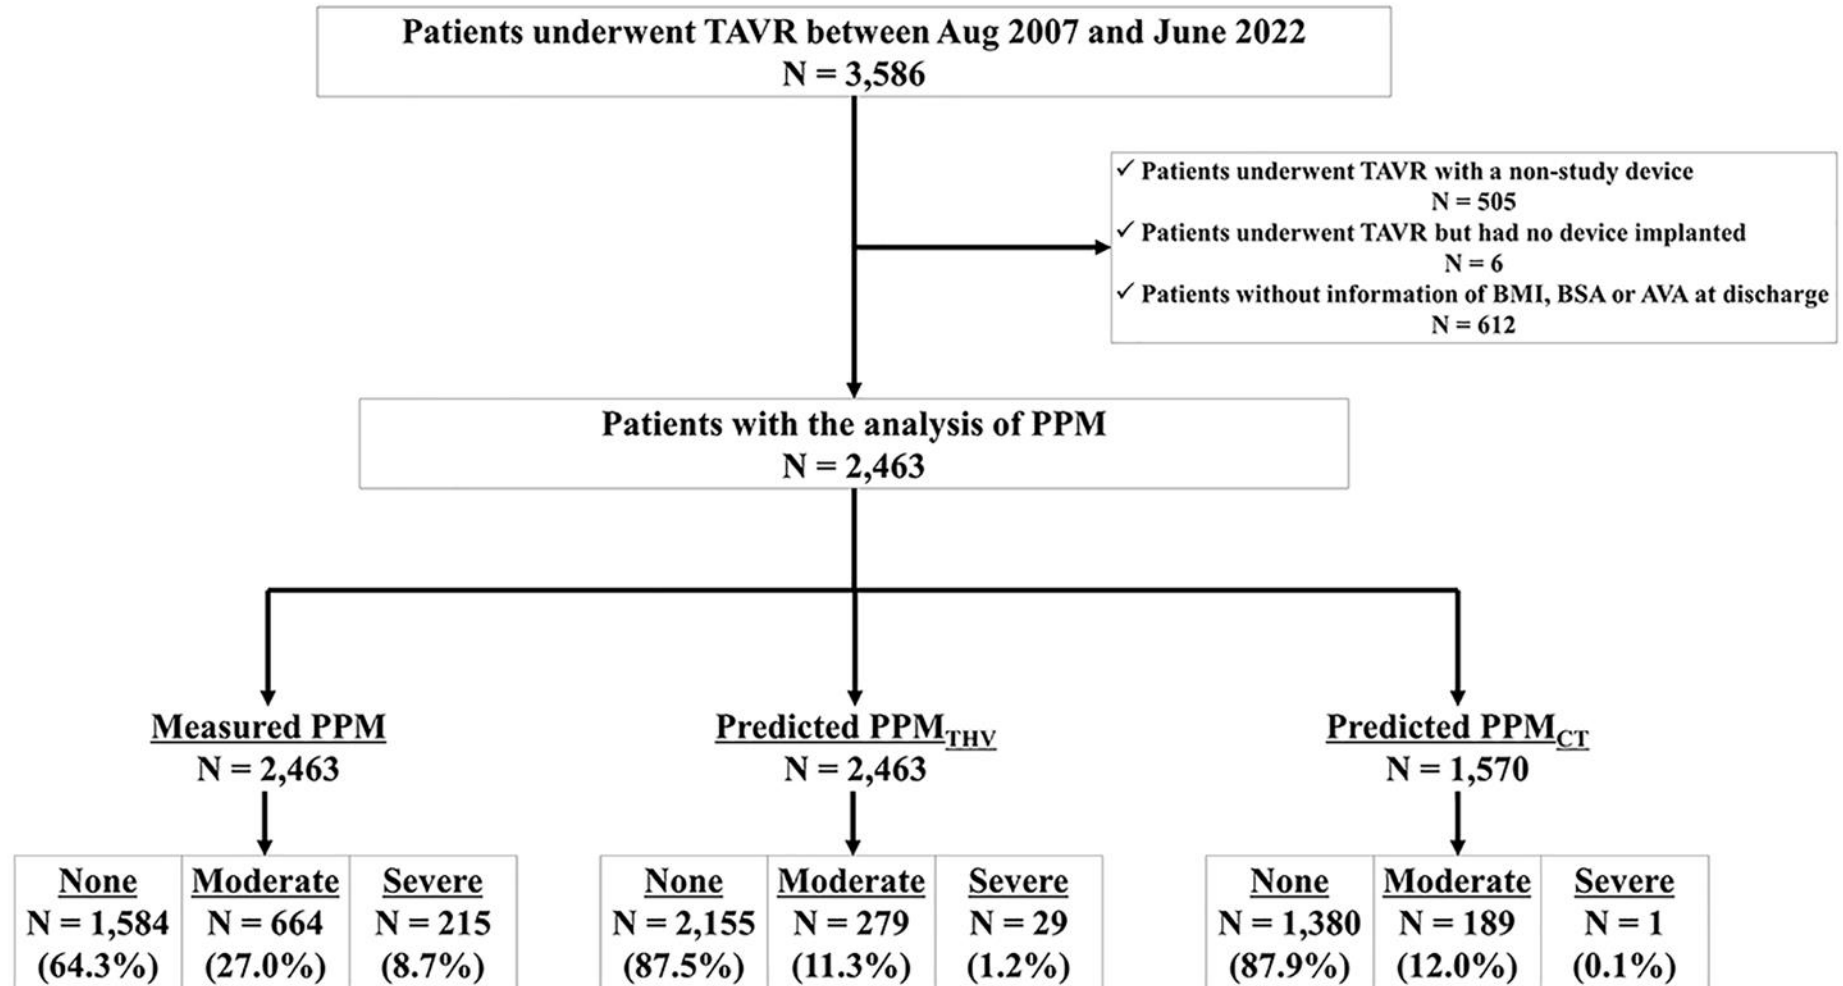

AVA = aortic valve area; BMI = body mass index; BSA = body surface area. Other abbreviations as Central Illustration.
